## **Can human embryonic stem cell-derived stromal cells serve a starting material for myoblasts?**

Yu Ando<sup>1</sup>, Marie Saito<sup>1</sup>, Masakazu Machida<sup>1</sup>, Chikako Noro<sup>2</sup>, Masataka Takahashi<sup>1</sup>, Masashi Toyoda<sup>3</sup>, and Akihiro Umezawa<sup>1\*</sup>

<sup>1</sup>Center for Regenerative Medicine, National Research Institute for Child Health and Development, Tokyo, 157-8535, Japan

<sup>2</sup>Department of Applied Molecular Chemistry, College of Industrial Technology, Nihon University

<sup>3</sup>Research team for Geriatric Medicine (Vascular Medicine), Tokyo Metropolitan Institute of Gerontology, Tokyo, 173-0015, Japan

Running head: hESC-derived myocytes

\*Correspondence should be directed to:

Akihiro Umezawa,

Center for Regenerative Medicine

National Research Institute for Child Health and Development

2-10-1 Okura, Setagaya,

Tokyo, 157-8535, JAPAN

Phone: +81-3-5494-7047

Fax: +81-3-5494-7048

E-mail: [umezawa@1985.jukuin.keio.ac.jp](mailto:umezawa@1985.jukuin.keio.ac.jp)

## ABSTRACT

A large number of myocytes is necessary to treat intractable muscular disorders such as Duchenne muscular dystrophy with cell-based therapies. However, starting materials for cellular therapy products such as myoblasts, marrow stromal cells, menstrual blood-derived cells and placenta-derived cells have a limited lifespan and cease to proliferate *in vitro*. From the viewpoints of manufacturing and quality control, cells with a long lifespan are more suitable as a starting material. In this study, we generated stromal cells for future myoblast therapy from a working cell bank of human embryonic stem cells (ESCs). The ESC-derived CD105<sup>+</sup> cells with extensive *in vitro* proliferation capability exhibited myogenesis and genetic stability *in vitro*. These results imply that ESC-derived CD105<sup>+</sup> cells are another cell source for myoblasts in cell-based therapy for patients with genetic muscular disorders. Since ESCs are immortal, mesenchymal stromal cells generated from ESCs can be manufactured at a large scale in one lot for pharmaceutical purposes.

## INTRODUCTION

Duchenne muscular dystrophy is an intractable genetic disorder and effective therapies have not yet been developed. Novel approaches to treat Duchenne muscular dystrophy include small molecules, gene therapy, biologics such as cytokines and cell-based therapy (Asakura, 2014; Miyagoe-Suzuki and Takeda, 2010). Among these advanced therapeutic approaches, regenerative therapies have been focused due to recent advances of pluripotent stem cells with different types of reprogramming technologies (Higuchi et al., 2015; Santostefano et al., 2015). *In vitro* expansion of quality-controlled stem cells and transplantation into patients with degenerative diseases in an allogeneic manner can be one of the ideal therapeutic scenarios. Somatic cells such as myoblasts, marrow stromal cells, menstrual blood-derived cells and placenta (amnion, chorionic plate, umbilical cord)-derived cells have been introduced as starting materials for cellular therapy products (Cui et al., 2011; Cui et al., 2007; Hida et al., 2008; Kawamichi et al., 2010; Toyoda et al., 2007). However, these somatic cells have a limited lifespan and cease to proliferate *in vitro*, and thus sufficient numbers of cells cannot be prepared to treat muscles of a whole body in cell-based therapies. From this viewpoint, cells with a long lifespan are more suitable for starting materials.

Human pluripotent stem cells such as embryonic stem cells (ESCs) and induced pluripotent stem cells (iPSCs) are immortal, and can therefore be a good source of large number of cellular therapy products with one lot for genetic muscular disorders (Asakura, 2014). In addition to immortality, ESCs and iPSCs exhibit pluripotency, i.e. capability to differentiate theoretically into almost all types of cells including myoblasts and their progenitor cells (Barberi et al., 2005). As a therapeutic cellular products, myoblasts and mesenchymal stromal cells are considered most suitable. In this study, we generated mesenchymal stromal cells

from ESCs for the production of cellular therapy products to treat patients with genetic muscular disorders (Assereto et al., 2016; De Paepe et al., 2016). We developed a novel protocol to manufacture mesenchymal stromal cells from ESCs with certified materials that had been analyzed for viruses.

## **RESULTS**

### **Generation of mesenchymal stromal cells**

To generate mesenchymal stromal cells from human ESCs, we propagated sees2 cells on mouse embryonic fibroblasts (MEFs) and formed embryoid bodies (EBs) for 4 days on a feeder layer of freshly plated gamma-irradiated mouse embryonic fibroblasts (Figure 1). The EBs were then transferred to the collagen-coated flasks and cultivated for 60 to 70 days. The upper adherent cell layer was detached to obtain a resource of mesenchymal stromal cells.

### **Propagation of mesenchymal stromal cells**

We repeated generation of mesenchymal stromal cells from sees2 cells in 4 different independent experiments (#3, #14, #23, #25), and investigated proliferation rate of the mesenchymal stromal cells (#3, #14, #23, #25) for over 50 days (Figure 2A). The mesenchymal stromal cells rapidly proliferated in culture and propagated continuously, however stopped replicating, became broad and flat, and exhibited SA- $\beta$ -galactosidase activity as indicated by blue staining of their cytoplasm at passage 11 (Figure 2B, C). The enlargement of the cell size was passage-dependent.

### **Flow cytometric and karyotypic analysis**

Flow cytometric analysis revealed that the mesenchymal stromal cells #2 and #3 were

positive for CD90, CD105 and HLA-ABC, and negative for HLA-DR (Figure 3A). The expression level and pattern of these markers remained unchanged after 3 or 4 passages (12 or 16 population doublings). Karyotypic analyses of the mesenchymal stromal cells #2 and #3 were performed at passage 3 and 2, respectively (Figure 3B). They were found to be diploid and not to exhibit any significant abnormalities. The chromosome number of both #2 and #3 was 46 without exception.

### **Global outlook by hierarchical clustering and principal component analysis (PCA)**

To investigate myogenic potential, mesenchymal stromal cells were analyzed, depending on gene expression levels. Hierarchical clustering analysis based on all probes, mesenchyme-associated genes, and stem cell-associated genes revealed that the mesenchymal stromal cells were categorized into the same group in a passage-dependent manner (Figure 4A, B, C).

Likewise, hierarchical clustering analysis and PCA on the expression pattern of the myogenic and cardiomyogenic genes also show passage-dependent categorization (Figure 4D and 4E, Supplemental Table 1). After the induction, the mesenchymal stromal cells started to form multinucleated myotubes (Figure 4F).

## **DISCUSSION**

For the development of cell-based therapeutic strategies to genetic myogenic disorders, immortal cells as a raw material are required to gain sufficient number of cells, and detailed studies are therefore essential with regard to the characteristics of differentiated mesenchymal stromal cells. This present study demonstrated the detailed alterations of the mesenchymal stromal cells during expansion from P0 to P11 in monolayer culture. The fate of mesenchymal stromal cells generated from ESCs depended on passage number or population

doubling levels in culture. In our previous study, we showed that human marrow stromal cells and umbilical cord blood-derived cells reach senescence, exhibit large, flat morphology at late passages and have different characteristics, depending on passage number and population doublings (Mori et al., 2005; Terai et al., 2005). Myogenic ability of ESC-derived mesenchymal stromal cells is possibly associated with surface markers, morphology, cytokines and differentiation capacity. c-kit, CD34, and CD140 serve as good markers to distinguish murine mesenchymal cells with multipotency, i.e. mesenchymal stem cells (Gojo and Umezawa, 2003). CD29+, CD44+, CD59+ and CD90+ cells from menstrual blood are capable of differentiating into myoblasts/myocytes and conferring human dystrophin expression in the murine model for Duchenne muscular dystrophy (Cui et al., 2007). In this study, we generated high-purity mesenchymal stromal cells for future myoblast therapy from a working cell bank of ESCs. The ESC-derived CD105+ cells with *in vitro* extensive proliferation capability exhibited myogenesis and genetic stability *in vitro*, implying that ESC-derived CD105+ cells are another cell sources for myoblasts in cell-based therapy to patients with genetic muscular disorders. Since ESCs are immortal, mesenchymal stromal cells generated from ESCs can be manufactured in a large scale with one lot in pharmaceutical purpose.

Mesenchymal stromal cells derived from ESCs have been examined from the viewpoints of differentiation propensity, surface markers, proliferation, and morphology (Barberi et al., 2005; Fu et al., 2015; Kimbrel et al., 2014; Moslem et al., 2015; Phillips et al., 2014; Trivedi and Hematti, 2008). They exhibit multipotency, i.e. adipogenic, osteogenic and chondrogenic differentiation *in vitro* (Barberi et al., 2005). They also show myogenic differentiation *in vitro* like mesenchymal stem cells derived from bone marrow, menstrual blood and placenta (Cui

et al., 2007; Kawamichi et al., 2010; Kohyama et al., 2001; Mori et al., 2005; Okamoto et al., 2007; Umezawa et al., 1992). These mesenchymal stromal cells can be used for therapeutic agents or delivery vehicles to patients with graft versus host disease, ischemic heart disease, and lysosomal storage disorders. With the robust scalable manufacturing process described in this study, ESC-derived CD105+ cells serve as a starting material of these possible cellular therapy agents. ESC-derived CD105+ cells were mortal while the original ESCs (sees2) were immortal. The cells are, therefore, non-tumorigenic because they reach senescence or stop dividing after a limited number of replications. This limited cell lifespan could be an advantage from the viewpoint of tumorigenicity, but a disadvantage for scalable manufacturing of cell therapy products. iPSC-derived mesenchymal stromal cells exhibit almost the same phenotypes in differentiation propensity, surface markers, proliferation, and morphology as ESC-derived CD105+ cells (Chen et al., 2012; Phillips et al., 2014). Taken together, there is no great distinction in quality attributes of mesenchymal stromal cells derived from ESCs, iPSCs, and various tissues.

Implantation of myoblasts induced from ESC-derived mesenchymal stromal cells into patients with genetic muscular disorders is indeed an ideal strategy, from the viewpoint of industry-based, sustainable supply of large quantities of affordable, quality-controlled cells. It is unlikely that it is possible to prepare unaffected somatic cells in sufficient quantity, necessitating the use of stem cells from suitable, cost-effective allogeneic sources, such as ESCs and iPSCs. The cellular therapy products manufactured from ESCs and iPSCs can cover whole-body muscle because of their immortality. In addition, the proliferation capability and genetic stability of the ESC-derived mesenchymal stromal cells open up significant new possibilities in regenerative medicine. ESCs can be a promising cellular

source for cell-based therapy to treat Duchenne muscular dystrophy, a lethal human disease for which no effective treatment currently exists (Assereto et al., 2016; De Paepe et al., 2016).

## **MATERIALS AND METHODS**

### **Ethical statement**

Human cells in this study were performed in full compliance with the Ethical Guidelines for Clinical Studies. The cultivation of hESC lines were performed in full compliance with “the Guidelines for Derivation and Distribution of Human Embryonic Stem Cells (Notification of the Ministry of Education, Culture, Sports, Science, and Technology in Japan (MEXT)) and “the Guidelines for Utilization of Human Embryonic Stem Cells (Notification of MEXT)”. The experimental procedures were approved by the Institutional Review Board (IRB) at National Center for Child Health and Development. Animal experiments were performed according to protocols approved by the Institutional Animal Care and Use Committee of the National Research Institute for Child Health and Development. All experiments with mice were subject to the 3 R consideration (refine, reduce, replace) and all efforts were made to minimize animal suffering, and to reduce the number of animals used.

### **hESC culture**

sees2 and sees5 were routinely cultured onto a feeder layer of freshly plated gamma-irradiated mouse embryonic fibroblasts (MEFs), isolated from ICR embryos at 12.5 gestations and passages 2 times before irradiation (30 Gy), in the hESC culture media. The hESC media consisted of Knockout<sup>TM</sup>-Dulbecco’s modified Eagle’s medium (KO-DMEM) (Life Technologies, CA, USA; #10829-018) supplemented with 20% 35 kGy-irradiated



Knockout<sup>TM</sup>-Serum Replacement (KO-SR; #10828-028), 2 mM Glutamax-I (#35050-079), 0.1 mM non-essential amino acids (NEAA; #11140-076), 50 U/ml penicillin-50 µg/ml streptomycin (Pen-Strep) (#15070-063), and recombinant human full-length bFGF (Kaken Pharmaceutical Co., Ltd.) at 50 ng/ml. Cells were expanded using enzymatic passaging by recombinant trypsin (Roche Diagnostics, Indianapolis, USA).

### **Manufacturing procedure**

To generate embryoid bodies (EBs), sees2 and sees5 ( $5 \times 10^3$ /well) were dissociated into single cells with 0.5 mM EDTA (Life Technologies) after exposure to the rock inhibitor (Y-27632: A11105-01, Wako, Japan), and cultivated in the 96-well plates (Thermo Fisher Scientific) in the EB medium [76% Knockout DMEM, 20% 35 kGy-irradiated Xeno-free Knockout Serum Replacement (XF-KSR, Life Technologies, CA, USA), 2 mM GlutaMAX-I, 0.1 mM NEAA, Pen-Strep, and 50 µg/mL l-ascorbic acid 2-phosphate (Sigma-Aldrich, St. Louis, MO, USA)] for 4 days. The EBs were transferred to T25 flasks coated with NMPcollagenPS (Nippon Meat Packers. Inc.), and cultivated in the XF32 medium [85% Knockout DMEM, 15% 35 kGy-irradiated XF-KSR, 2 mM GlutaMAX-I, 0.1 mM NEAA, Pen-Strep, 50 µg/mL l-ascorbic acid 2-phosphate, 10 ng/mL heregulin-1β (recombinant human NRG-beta 1/HRG-beta 1 EGF domain; Wako, Japan), 200 ng/mL recombinant human IGF-1 (LONG R3-IGF-1; Sigma-Aldrich), and 20 ng/mL human bFGF (Kaken Pharmaceutical Co., Ltd.)] for 60 to 70 days. The flasks were gently shaken to detach the cells. The detached cells were aggregated and could thus be easily removed by a pipette. The remaining adherent cells in the flasks were used for a resource of mesenchymal stromal cells. The adherent cells were then propagated in α-MEM medium supplemented with 10% FBS (Gibco or Hyclone) and 1% Pen-Strep for further *in vitro* and *in vivo* analysis.

### **Karyotypic analysis**

Karyotypic analysis was contracted out to Nihon Gene Research Laboratories Inc. (Sendai, Japan). Metaphase spreads were prepared from cells treated with 100 ng/mL of Colcemid (Karyo Max, Gibco Co. BRL) for 6 h. The cells were fixed with methanol:glacial acetic acid (2:5) three times, and placed onto glass slides (Nihon Gene Research Laboratories Inc.). Chromosome spreads were Giemsa banded and photographed. A minimum of 10 metaphase spreads were analyzed for each sample, and karyotyped using a chromosome imaging analyzer system (Applied Spectral Imaging, Carlsbad, CA).

### **Gene chip analysis**

Total RNA was extracted using TRIzol reagent (Thermo Fisher Scientific Inc.) according to the manufacturer's instructions. RNA quantity and quality were determined using a Nanodrop ND-1000 spectrophotometer (Thermo Fisher Scientific Inc.) and an Agilent Bioanalyzer (Agilent Technologies, Santa Clara, CA). Total RNA was amplified and labeled with Cyanine 3 (Cy3) using Agilent Low Input Quick Amp Labeling Kit, one-color (Agilent Technologies) following the manufacturer's instructions. Briefly, total RNA was reversed transcribed to double-strand cDNA using a poly dT-T7 promoter primer. Primer, template RNA and quality-control transcripts of known concentration and quality were first denatured at 65°C for 10 min and incubated for 2 hours at 40°C with 5X first strand Buffer, 0.1 M DTT, 10 mM dNTP mix, and AffinityScript RNase Block Mix. The AffinityScript enzyme was inactivated at 70°C for 15 min. cDNA products were then used as templates for *in vitro* transcription to generate fluorescent cRNA. cDNA products were mixed with a transcription master mix in the presence of T7 RNA polymerase and Cy3 labeled-CTP and incubated at 40°C for 2 hours.

Labeled cRNAs were purified using QIAGEN's RNeasy mini spin columns and eluted in 30  $\mu$ l of nuclease-free water. After amplification and labeling, cRNA quantity and cyanine incorporation were determined using a Nanodrop ND-1000 spectrophotometer and an Agilent Bioanalyzer. For each hybridization, 0.60  $\mu$ g of Cy3 labeled cRNA were fragmented, and hybridized at 65°C for 17 hours to an Agilent SurePrint G3 Human GE v3 8x60K Microarray. After washing, microarrays were scanned using an Agilent DNA microarray scanner. Intensity values of each scanned feature were quantified using Agilent feature extraction software version 11.5.1.1, which performs background subtractions. We only used features which were flagged as no errors (Detected flags) and excluded features which were not positive, not significant, not uniform, not above background, saturated, and population outliers (Not Detected and Compromised flags). Normalization was performed using Agilent GeneSpring software version 13.0 (per chip:normalization to 75 percentile shift). There are total of 58,201 probes on Agilent SurePrint G3 Human GE v3 8x60K Microarray without control probes. Hierarchical clustering analysis and Principal Component Analysis were performed using NIA Array Analysis (<https://lgsun.grc.nia.nih.gov/ANOVA/>).

## **Funding information**

This research was supported by grants from the Ministry of Education, Culture, Sports, Science, and Technology (MEXT) of Japan; by Ministry of Health, Labor and Welfare (MHLW) Sciences research grants; by a Research Grant on Health Science focusing on Drug Innovation from the Japan Health Science Foundation; by the program for the promotion of Fundamental Studies in Health Science of the Pharmaceuticals and Medical Devices Agency; by the Grant of National Center for Child Health and Development. Computation time was provided by the computer cluster HA8000/RS210 at the Center for Regenerative Medicine, National Research Institute for Child Health and Development. We expand our acknowledgement to deanship of scientific research at King Saud University for funding this research through international research program "Metagenomics". AU thanks King Saud University, Riyadh, Kingdom of Saudi Arabia, for the Visiting Professorship.

## **ACKNOWLEDGEMENTS**

We would like to express our sincere thanks to Y. Takahashi and H. Abe for providing expert technical assistance, K. Miyado and H. Akutsu for fruitful discussion, to C. Ketcham for English editing and proofreading, and to E. Suzuki and K. Saito for secretarial work.

## **COMPETING FINANCIAL INTERESTS**

The authors declare no competing financial interests.

## **AUTHOR CONTRIBUTION STATEMENT**

AU designed experiments. YA, MS, and MM performed experiments. AU, YA, and MS analyzed data. MT contributed reagents, materials and analysis tools. CN, AU, MT and YA discussed the data and manuscript. AU and MS wrote this manuscript.

## Reference

Asakura, A. (2014). Grand challenges in the field of stem cell research. *Front Cell Dev Biol* 2, 2.

Assereto, S., Piccirillo, R., Baratto, S., Scudieri, P., Fiorillo, C., Massacesi, M., Traverso, M., Galietta, L.J., Bruno, C., Minetti, C., *et al.* (2016). The ubiquitin ligase tripartite-motif-protein 32 is induced in Duchenne muscular dystrophy. *Lab Invest* 96, 862-871.

Barberi, T., Willis, L.M., Socci, N.D., and Studer, L. (2005). Derivation of multipotent mesenchymal precursors from human embryonic stem cells. *PLoS Med* 2, e161.

Chen, Y.S., Pelekanos, R.A., Ellis, R.L., Horne, R., Wolvetang, E.J., and Fisk, N.M. (2012). Small molecule mesengenic induction of human induced pluripotent stem cells to generate mesenchymal stem/stromal cells. *Stem Cells Transl Med* 1, 83-95.

Cui, C.H., Miyoshi, S., Tsuji, H., Makino, H., Kanzaki, S., Kami, D., Terai, M., Suzuki, H., and Umezawa, A. (2011). Dystrophin conferral using human endothelium expressing HLA-E in the non-immunosuppressive murine model of Duchenne muscular dystrophy. *Hum Mol Genet* 20, 235-244.

Cui, C.H., Uyama, T., Miyado, K., Terai, M., Kyo, S., Kiyono, T., and Umezawa, A. (2007). Menstrual blood-derived cells confer human dystrophin expression in the murine model of Duchenne muscular dystrophy via cell fusion and myogenic transdifferentiation. *Mol Biol Cell* 18, 1586-1594.

De Paepe, B., Martin, J.J., Herbelet, S., Jimenez-Mallebrera, C., Iglesias, E., Jou, C., Weis, J., and De Bleecker, J.L. (2016). Activation of osmolyte pathways in inflammatory myopathy and Duchenne muscular dystrophy points to osmoregulation as a contributing pathogenic mechanism. *Lab Invest* 96, 872-884.

Fu, X., Chen, Y., Xie, F.N., Dong, P., Liu, W.B., Cao, Y., Zhang, W.J., and Xiao, R. (2015). Comparison of immunological characteristics of mesenchymal stem cells derived from human embryonic stem cells and bone marrow. *Tissue Eng Part A* 21, 616-626.

- Gojo, S., and Umezawa, A. (2003). Plasticity of mesenchymal stem cells--regenerative medicine for diseased hearts. *Hum Cell* 16, 23-30.
- Hida, N., Nishiyama, N., Miyoshi, S., Kira, S., Segawa, K., Uyama, T., Mori, T., Miyado, K., Ikegami, Y., Cui, C., *et al.* (2008). Novel cardiac precursor-like cells from human menstrual blood-derived mesenchymal cells. *Stem Cells* 26, 1695-1704.
- Higuchi, A., Ling, Q.D., Kumar, S.S., Munusamy, M.A., Alarfaj, A.A., Chang, Y., Kao, S.H., Lin, K.C., Wang, H.C., and Umezawa, A. (2015). Generation of pluripotent stem cells without the use of genetic material. *Lab Invest* 95, 26-42.
- Kawamichi, Y., Cui, C.H., Toyoda, M., Makino, H., Horie, A., Takahashi, Y., Matsumoto, K., Saito, H., Ohta, H., Saito, K., *et al.* (2010). Cells of extraembryonic mesodermal origin confer human dystrophin in the mdx model of Duchenne muscular dystrophy. *J Cell Physiol* 223, 695-702.
- Kimbrel, E.A., Kouris, N.A., Yavanian, G.J., Chu, J., Qin, Y., Chan, A., Singh, R.P., McCurdy, D., Gordon, L., Levinson, R.D., *et al.* (2014). Mesenchymal stem cell population derived from human pluripotent stem cells displays potent immunomodulatory and therapeutic properties. *Stem Cells Dev* 23, 1611-1624.
- Kohyama, J., Abe, H., Shimazaki, T., Koizumi, A., Nakashima, K., Gojo, S., Taga, T., Okano, H., Hata, J., and Umezawa, A. (2001). Brain from bone: efficient "meta-differentiation" of marrow stroma-derived mature osteoblasts to neurons with Noggin or a demethylating agent. *Differentiation* 68, 235-244.
- Miyagoe-Suzuki, Y., and Takeda, S. (2010). Gene therapy for muscle disease. *Exp Cell Res* 316, 3087-3092.
- Mori, T., Kiyono, T., Imabayashi, H., Takeda, Y., Tsuchiya, K., Miyoshi, S., Makino, H., Matsumoto, K., Saito, H., Ogawa, S., *et al.* (2005). Combination of hTERT and bmi-1, E6, or E7 induces prolongation of the life span of bone marrow stromal cells from an elderly donor without affecting their neurogenic potential. *Mol Cell Biol* 25, 5183-5195.
- Moslem, M., Eberle, I., Weber, I., Henschler, R., and Cantz, T. (2015). Mesenchymal Stem/Stromal Cells Derived from Induced Pluripotent Stem Cells Support CD34(pos)



Hematopoietic Stem Cell Propagation and Suppress Inflammatory Reaction. *Stem Cells Int* 2015, 843058.

Okamoto, K., Miyoshi, S., Toyoda, M., Hida, N., Ikegami, Y., Makino, H., Nishiyama, N., Tsuji, H., Cui, C.H., Segawa, K., *et al.* (2007). 'Working' cardiomyocytes exhibiting plateau action potentials from human placenta-derived extraembryonic mesodermal cells. *Exp Cell Res* 313, 2550-2562.

Phillips, M.D., Kuznetsov, S.A., Cherman, N., Park, K., Chen, K.G., McClendon, B.N., Hamilton, R.S., McKay, R.D., Chenoweth, J.G., Mallon, B.S., *et al.* (2014). Directed differentiation of human induced pluripotent stem cells toward bone and cartilage: in vitro versus in vivo assays. *Stem Cells Transl Med* 3, 867-878.

Santostefano, K.E., Hamazaki, T., Biel, N.M., Jin, S., Umezawa, A., and Terada, N. (2015). A practical guide to induced pluripotent stem cell research using patient samples. *Lab Invest* 95, 4-13.

Terai, M., Uyama, T., Sugiki, T., Li, X.K., Umezawa, A., and Kiyono, T. (2005). Immortalization of human fetal cells: the life span of umbilical cord blood-derived cells can be prolonged without manipulating p16INK4a/RB braking pathway. *Mol Biol Cell* 16, 1491-1499.

Toyoda, M., Cui, C., and Umezawa, A. (2007). Myogenic transdifferentiation of menstrual blood-derived cells. *Acta Myol* 26, 176-178.

Trivedi, P., and Hematti, P. (2008). Derivation and immunological characterization of mesenchymal stromal cells from human embryonic stem cells. *Exp Hematol* 36, 350-359.

Umezawa, A., Maruyama, T., Segawa, K., Shaddock, R.K., Waheed, A., and Hata, J. (1992). Multipotent marrow stromal cell line is able to induce hematopoiesis in vivo. *J Cell Physiol* 151, 197-205.

## **FIGURE LEGENDS**

### **Figure 1. Generation of mesenchymal stromal cells from sees2.**

- A. Step-by-step manufacturing process.
- B. Scheme for generation of mesenchymal stromal cells from sees2.

### **Figure 2. Characterization of mesenchymal stromal cells.**

- A. Growth curve of mesenchymal stromal cells (knst#3, #14, #23, #25)
- B. Phase contrast photomicrography of mesenchymal stromal cells (knst#2: passage 1, 4, 7, and 11)
- C. Senescence-associated beta-galactosidase stain (knst#3, passage 11).

### **Figure 3. Flow cytometric analysis and karyotypic analysis**

- A. Flow cytometric analysis of knst#2 (passage 3 and 6) and knst#3 (passage 3 and 7).
- B. Karyotypic analysis of knst#2 (passage 3) and knst#3 (passage 2).

### **Figure 4. Global gene expression analysis of ESC-derived mesenchymal stromal cells.**

- A. Hierarchical clustering analysis based on the expression of all genes (58,201 probes on Agilent SurePrint G3 Human GE v3 8x60K Microarray).
- B. Hierarchical clustering analysis based on expression levels of the mesenchyme-associated genes.
- C. Hierarchical clustering analysis based on expression levels of the stem cell-associated genes.
- D. Hierarchical clustering analysis based on expression levels of the muscle-associated genes.

- E. Principal component analysis of the muscle-associated genes.
- F. Phase-contrast photomicrographs of knst myogenesis.

**A**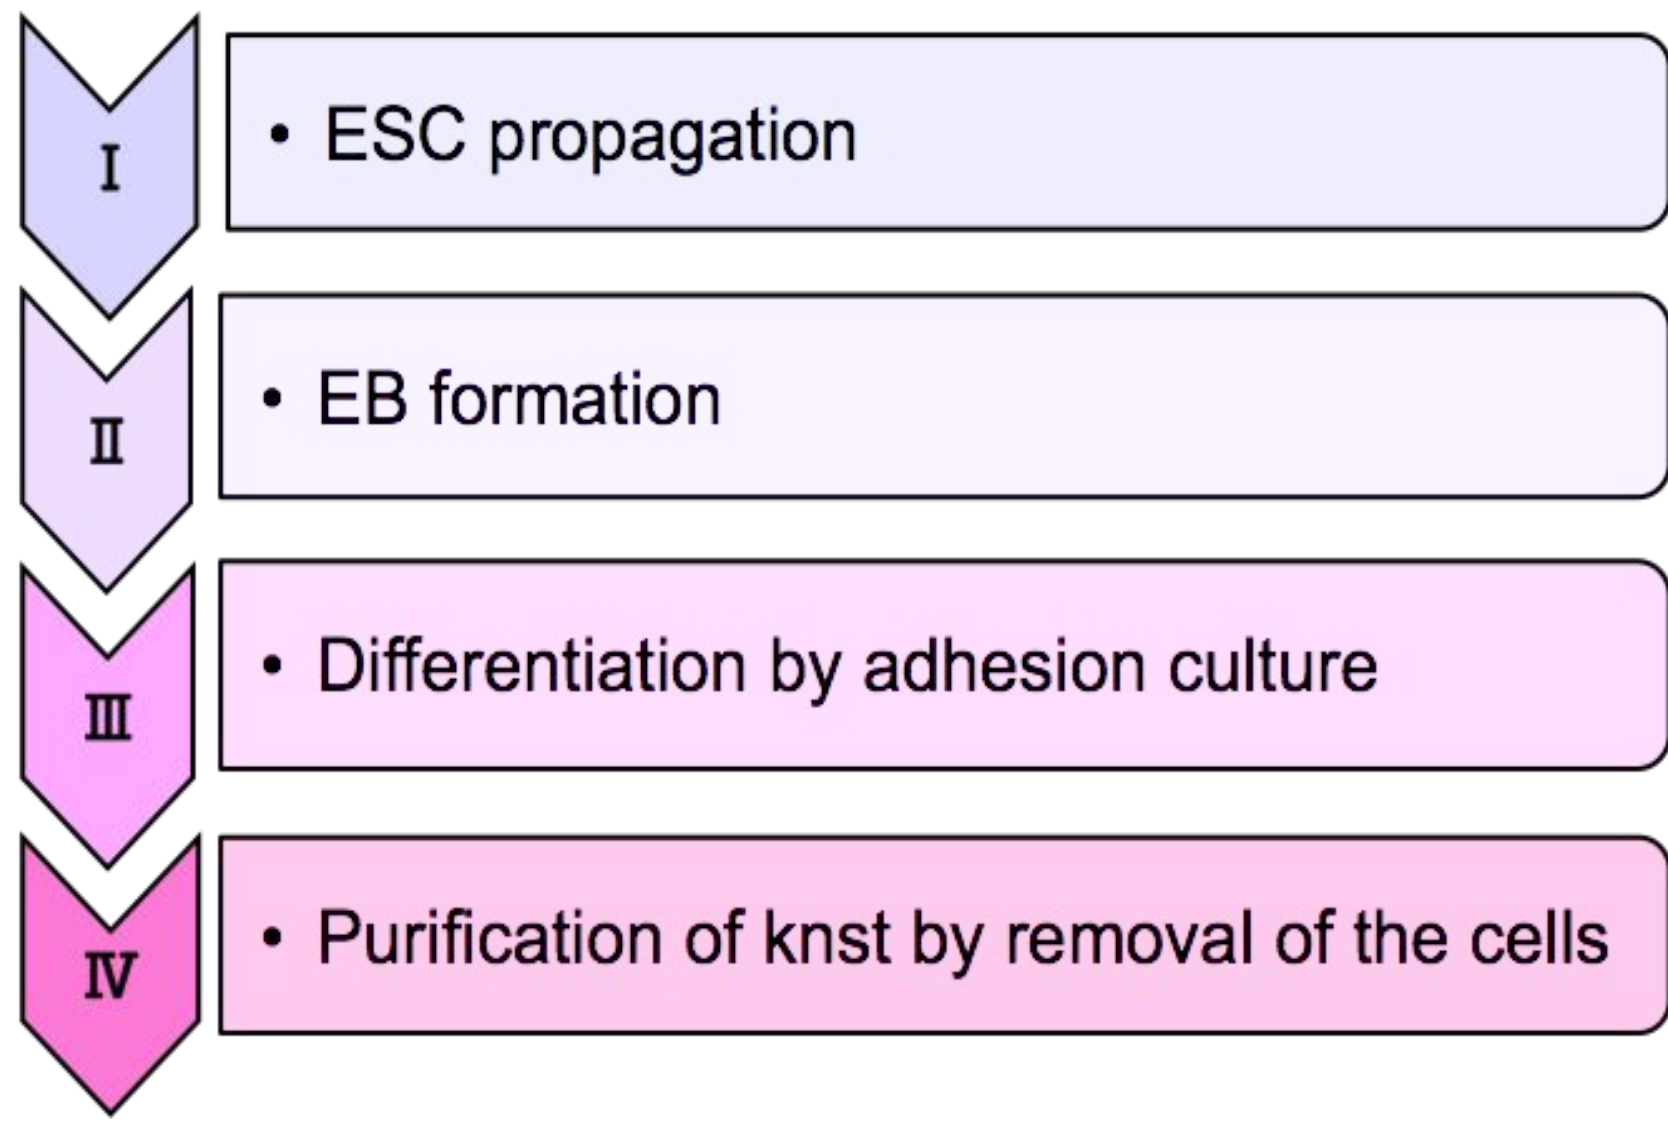**B**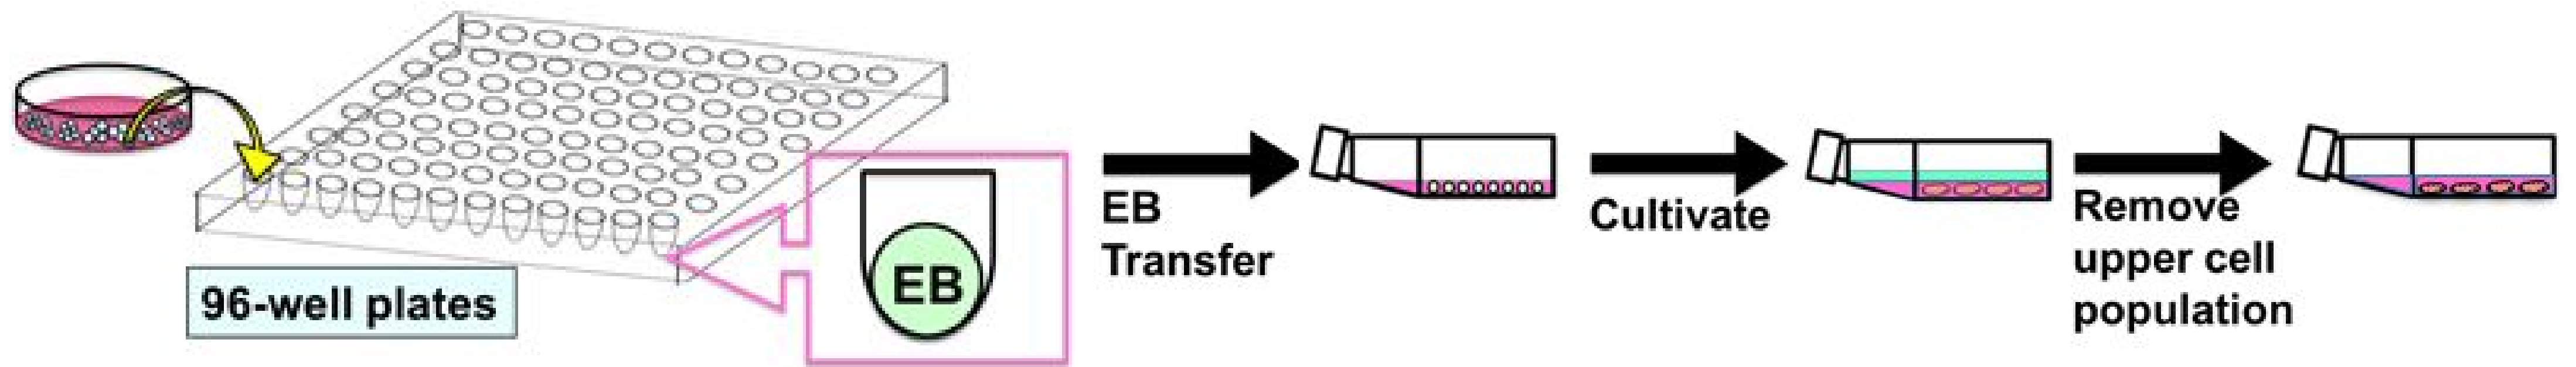



**A**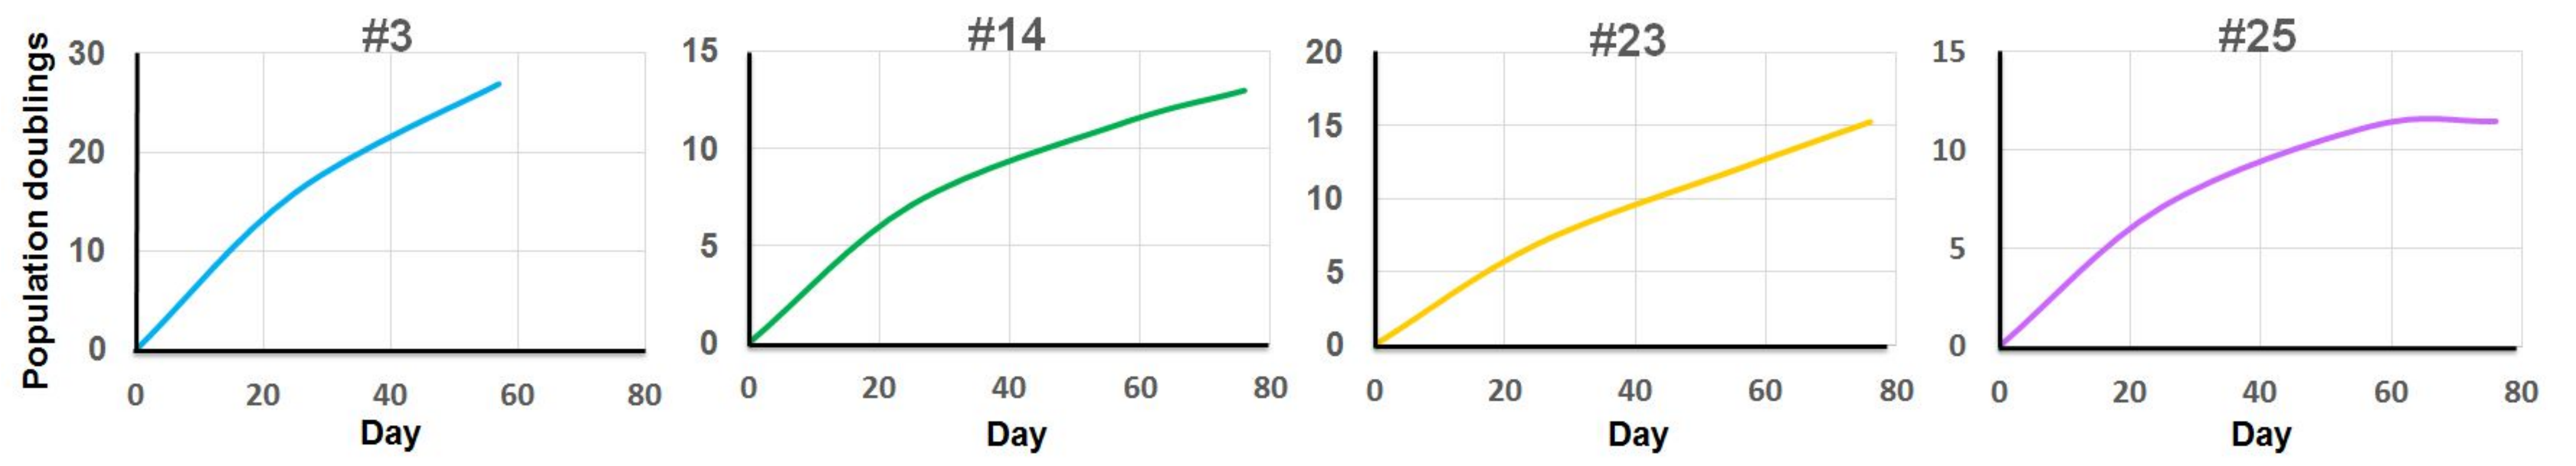**B**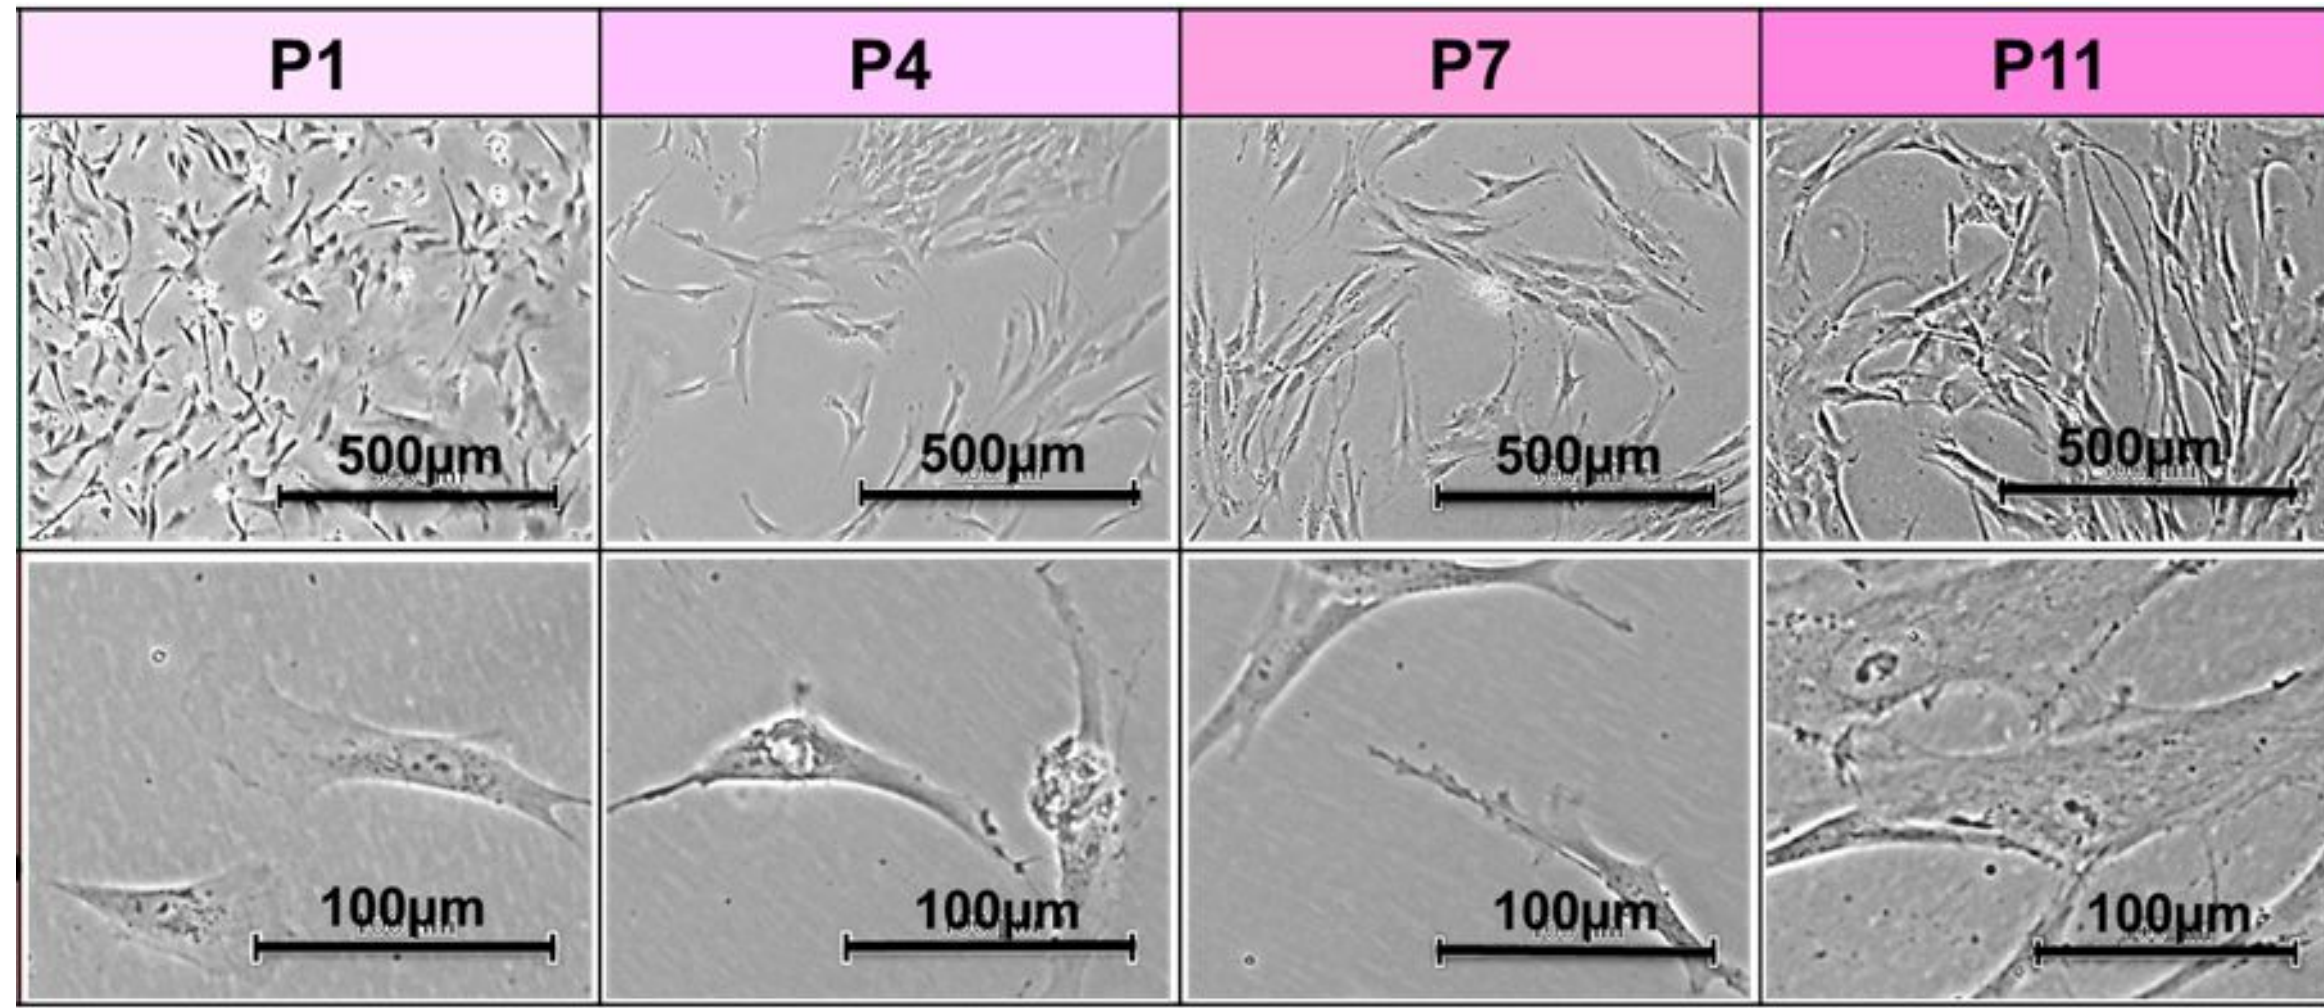**C**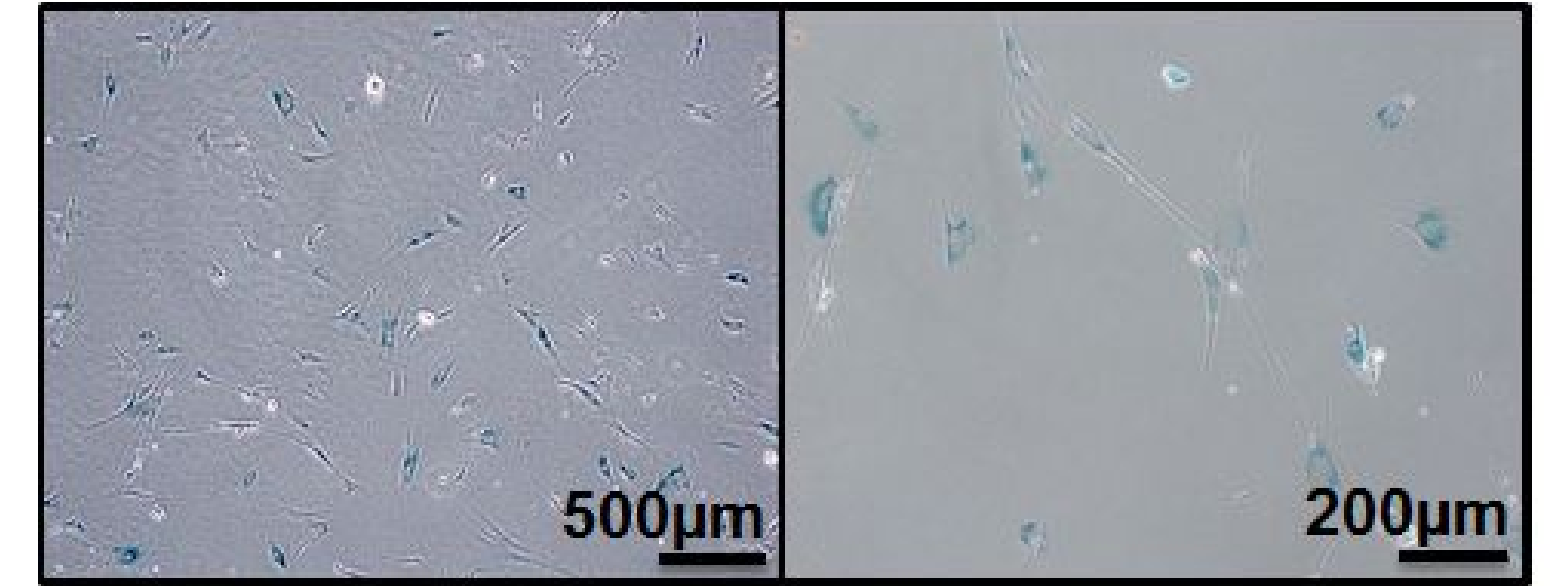

**A**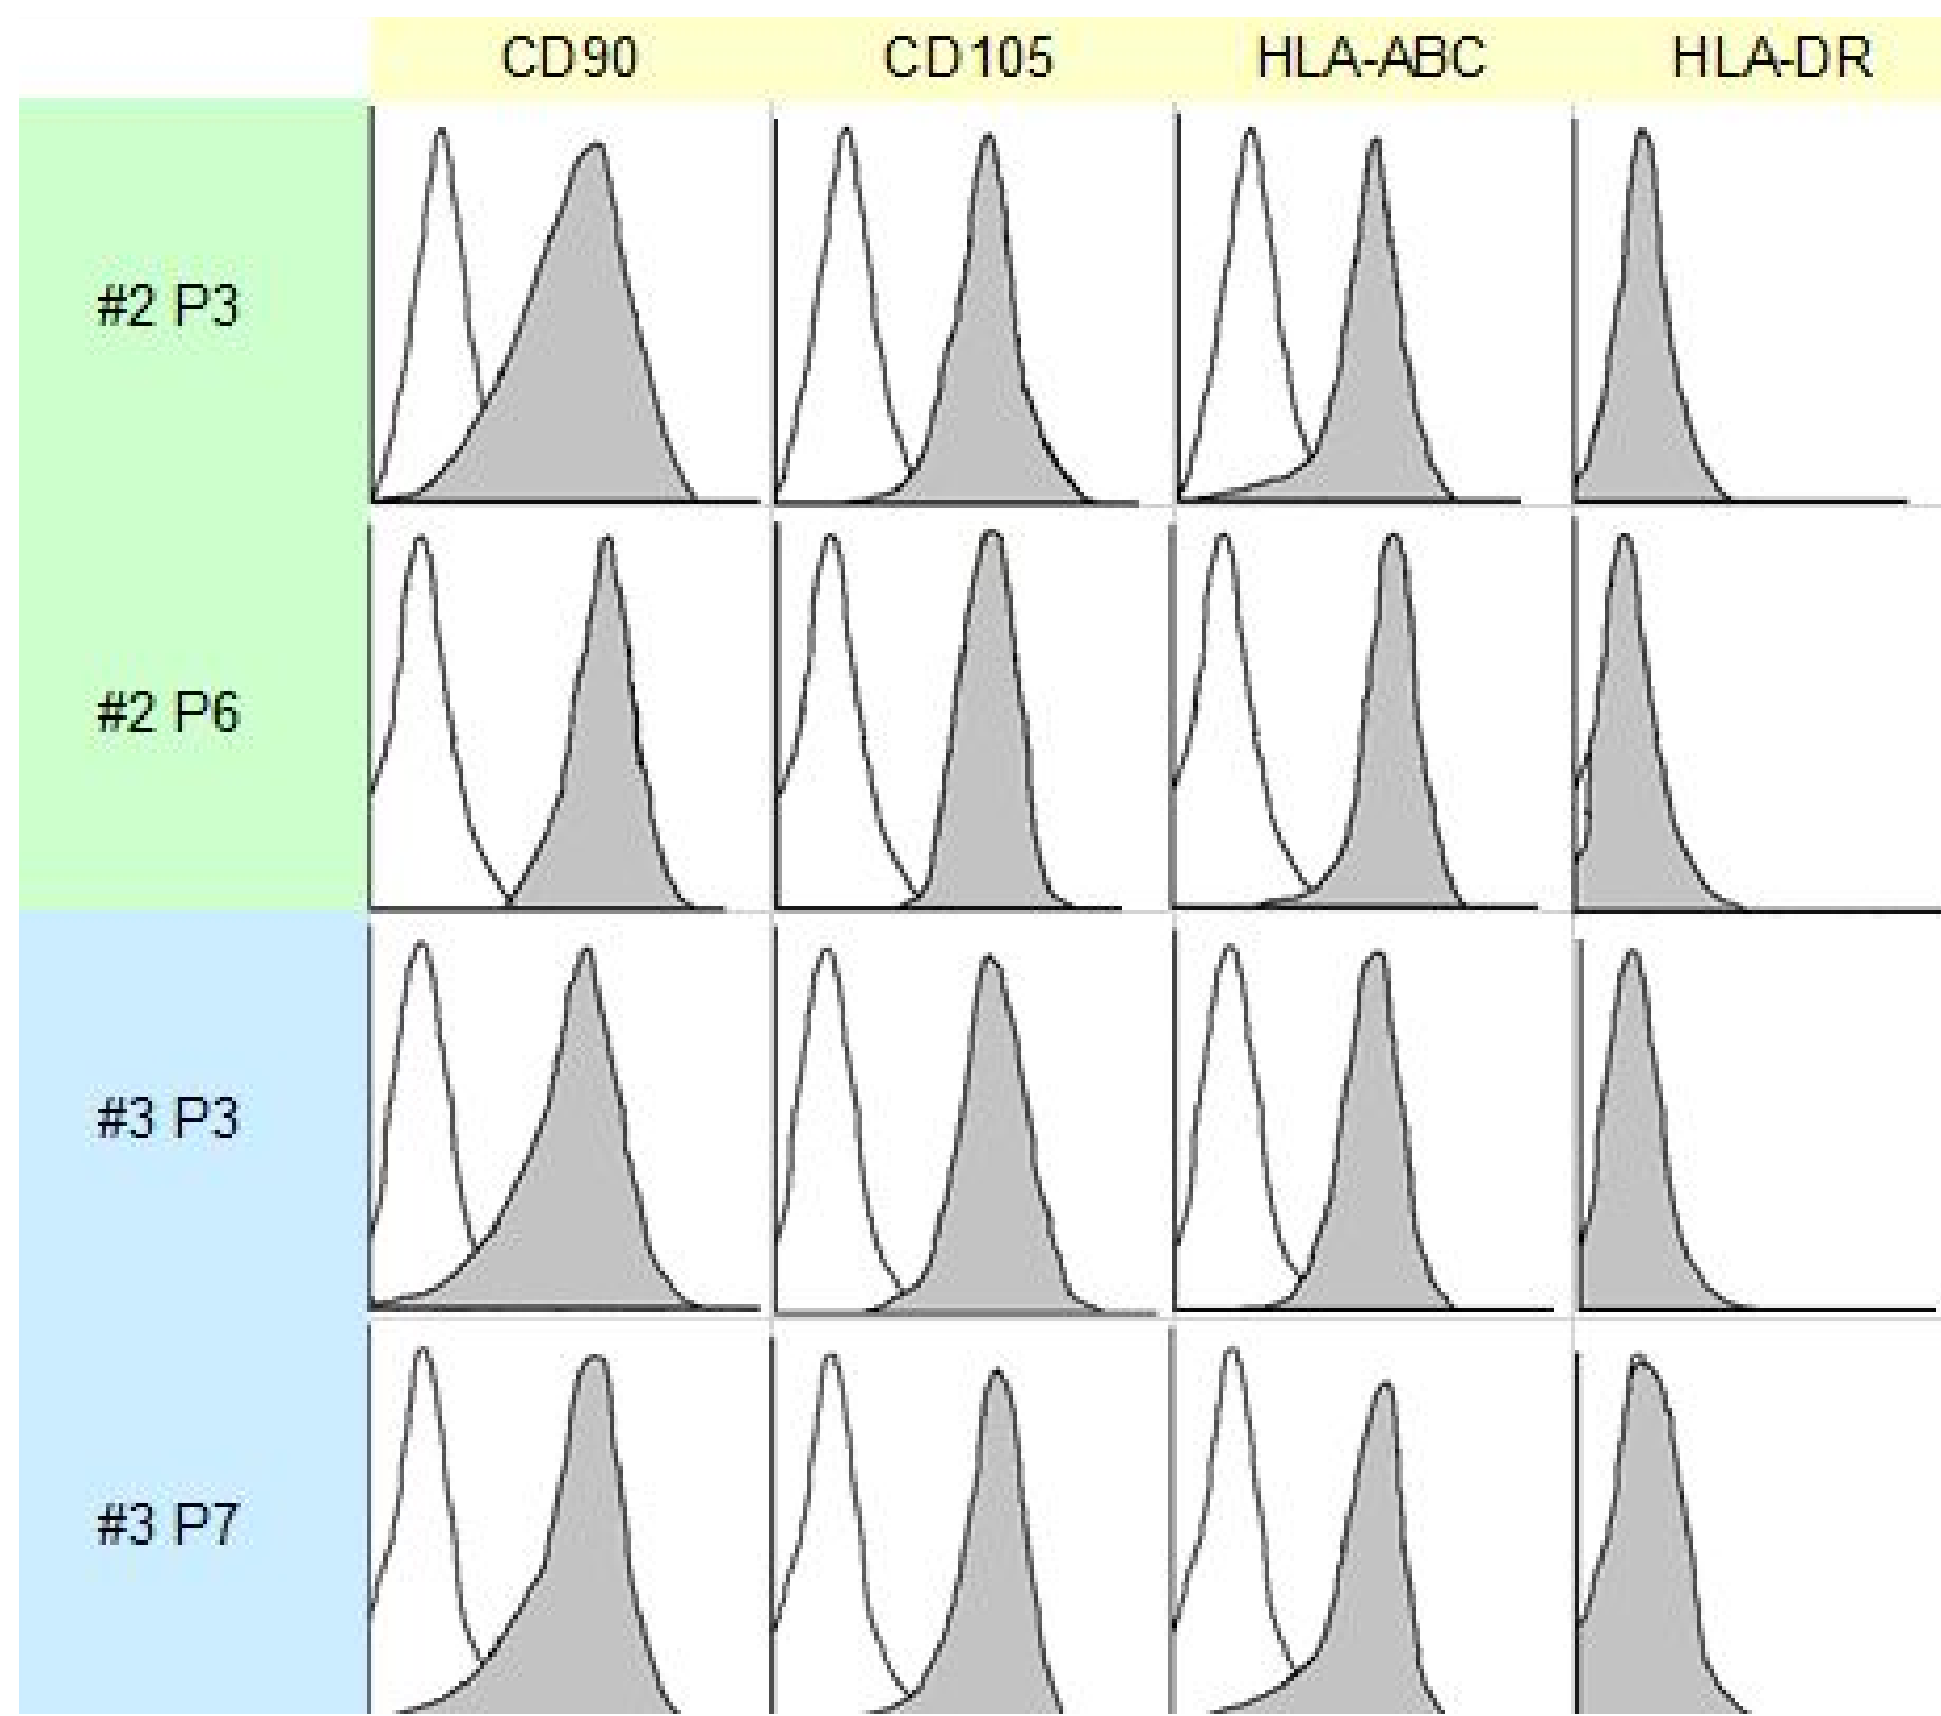**B**

| Cell  | Mode   | Karyotype   |
|-------|--------|-------------|
| #2 P3 | 46(50) | 46, XX [20] |
| #3 P2 | 46(50) | 46, XX [20] |

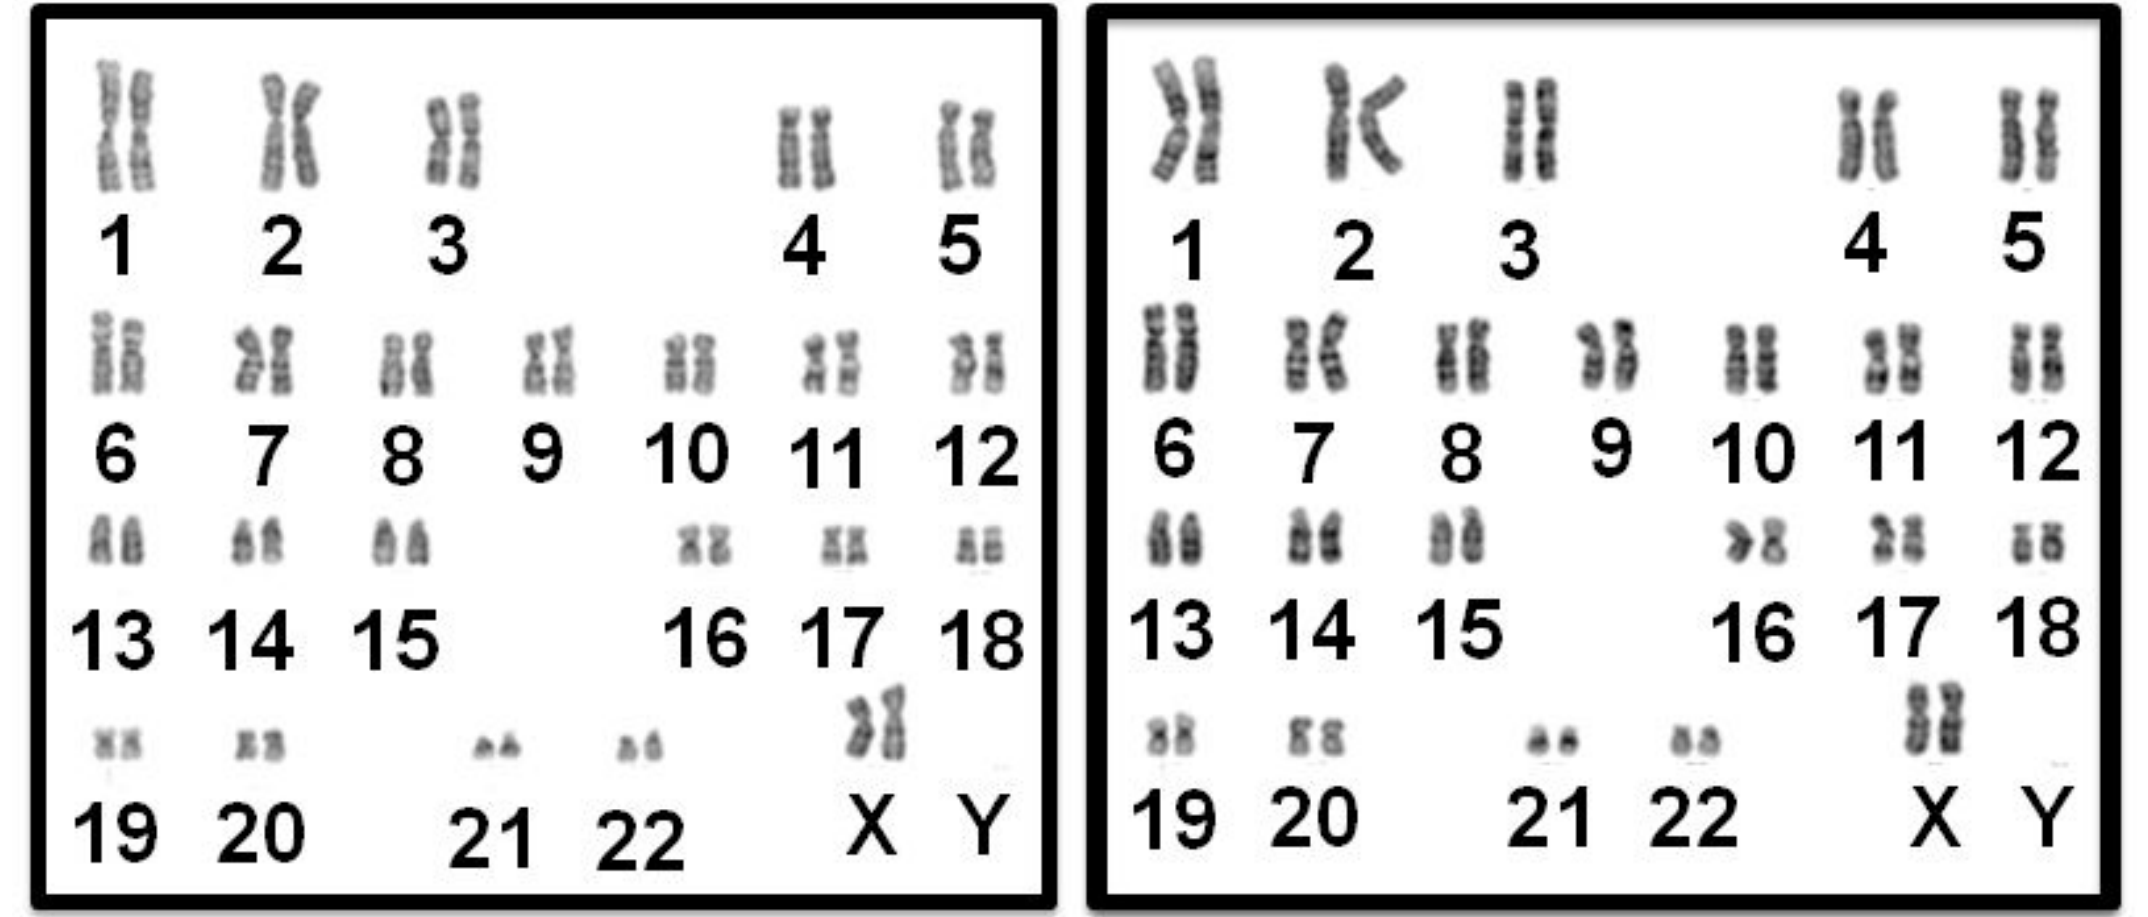

#2 P3

#3 P2

**Figure 3**



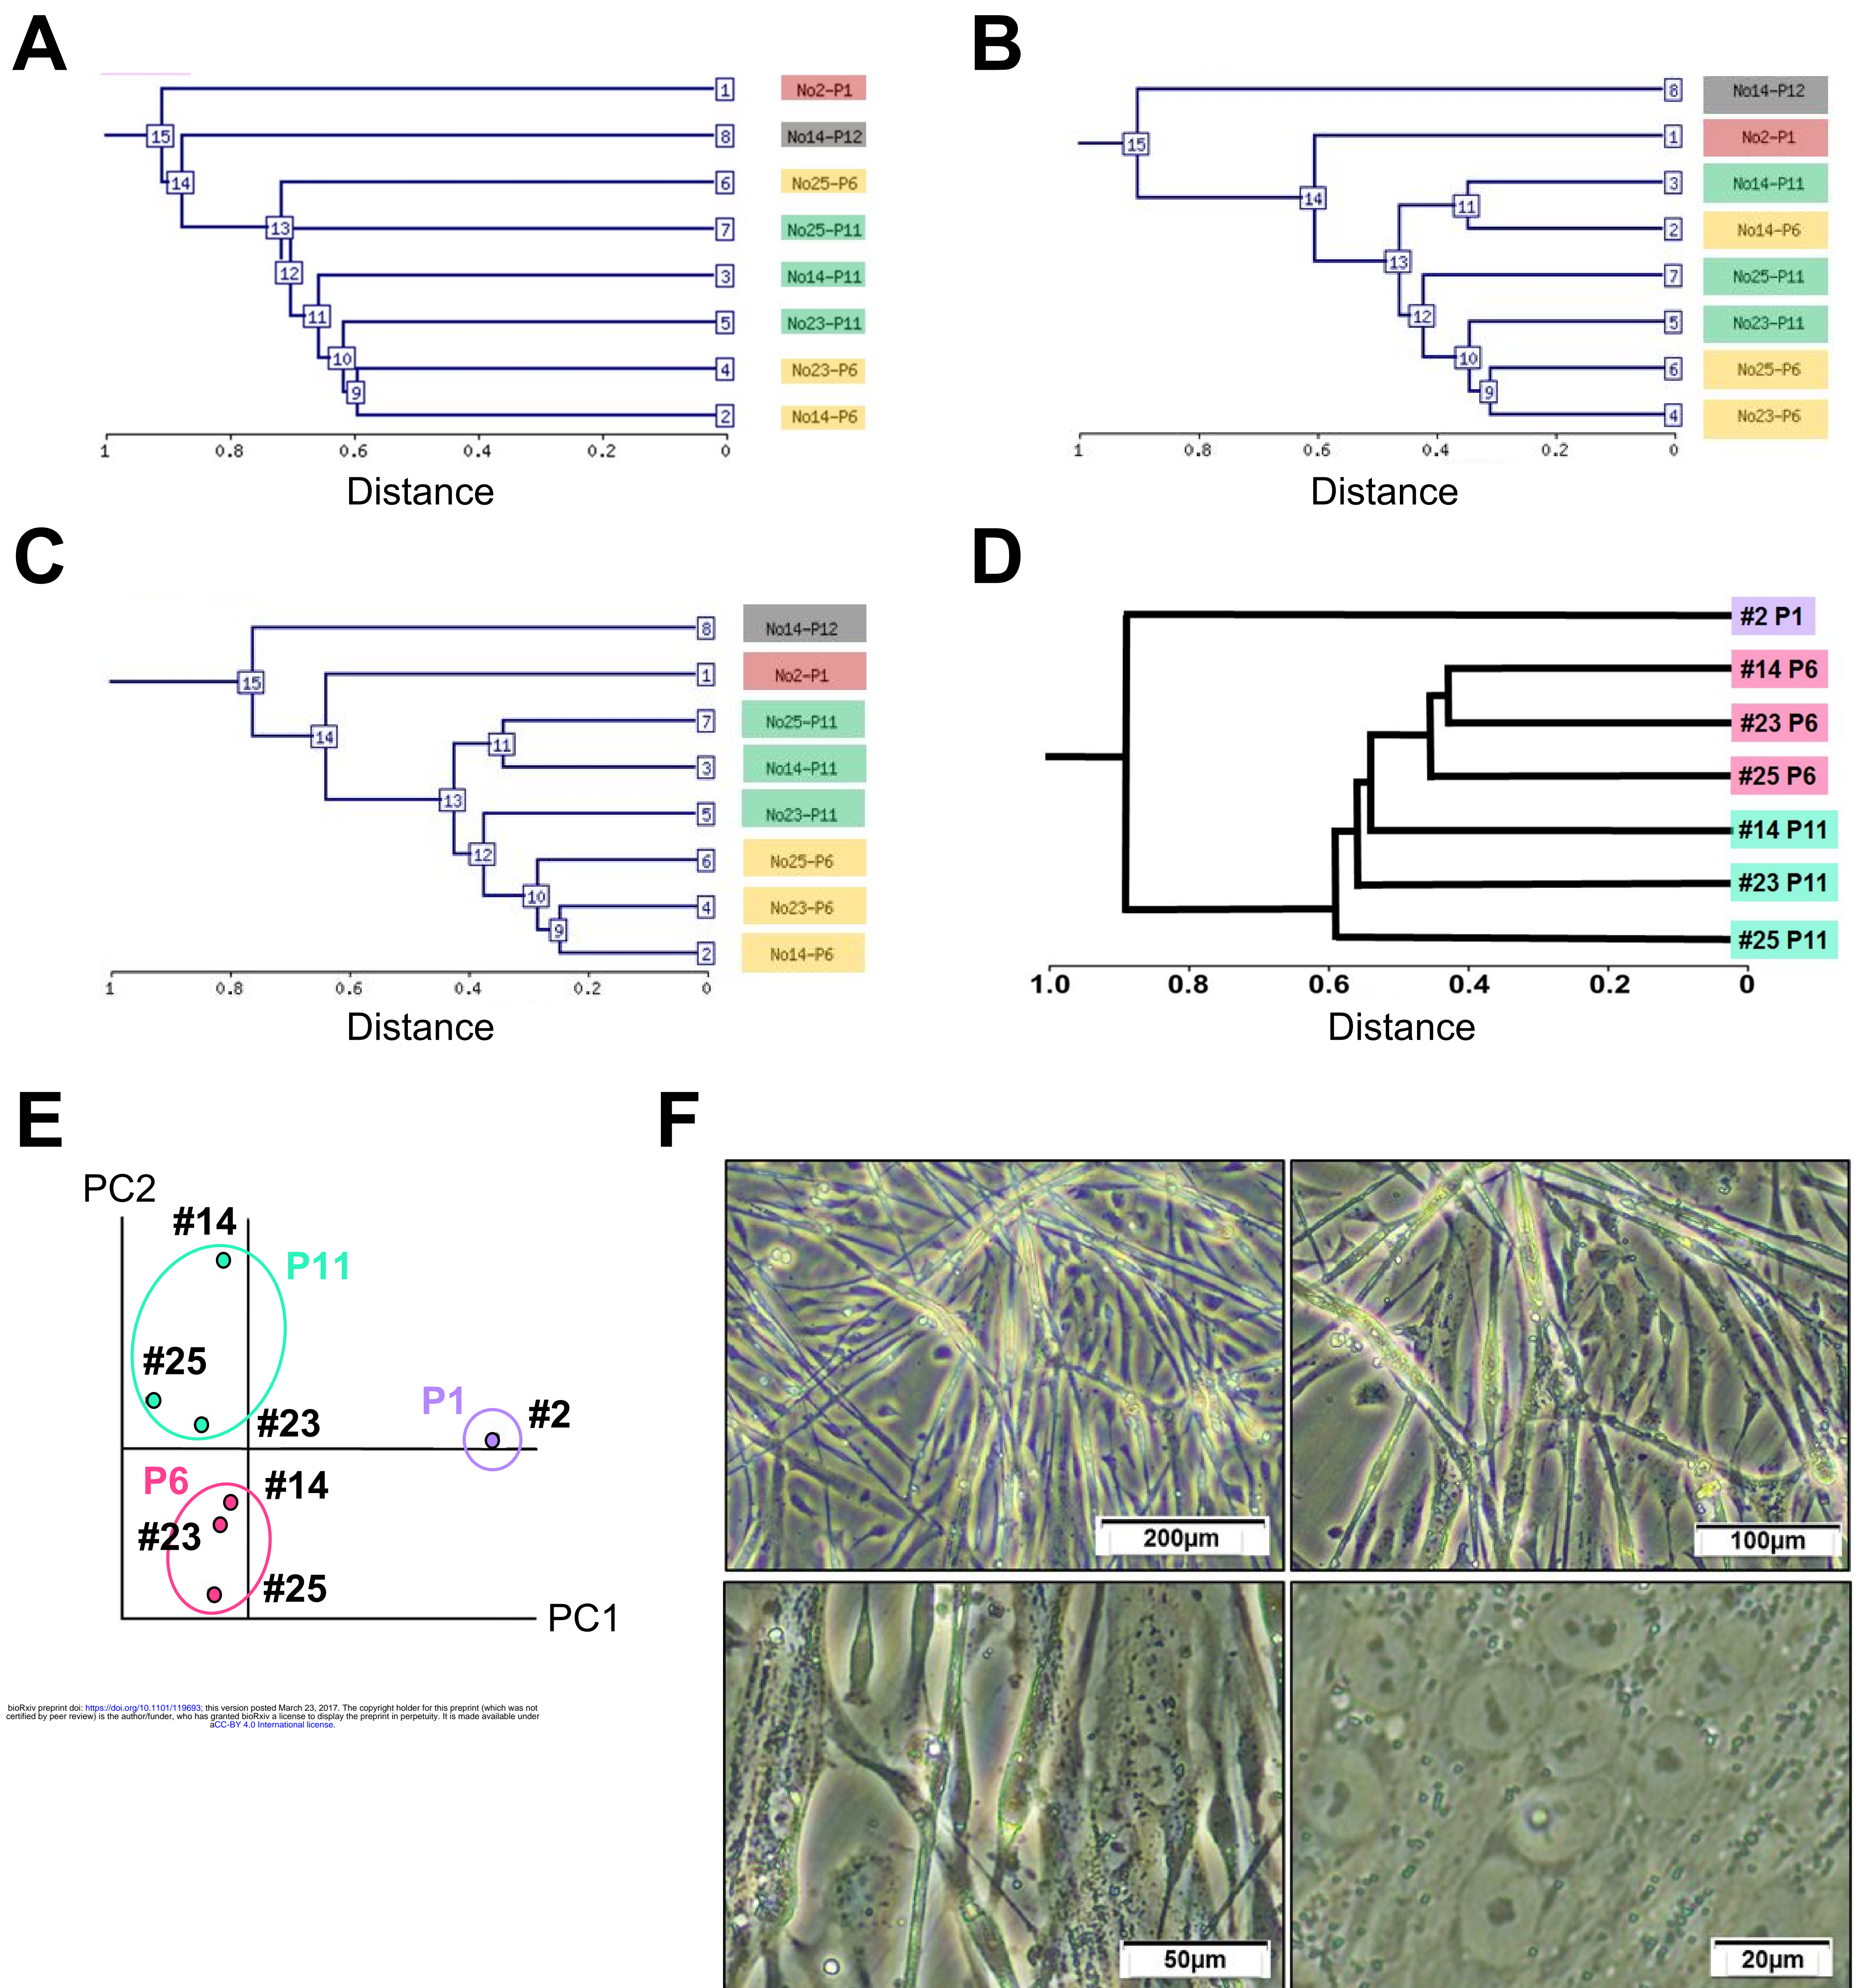

**Figure 4**
